# Supplementary material for: Mixed host co-assembled systems for broad-scope analyte sensing
Source: Royal Society of Chemistry journal article supplement (doi:10.1039/d4sc02788d), 2024-01-01
Supplement: d4sc02788d1.xlsx [file d4sc02788d1.xlsx]

## Sheet: S19_Cannabinoids_DD-CB
	FigS19_Cannabinoids_DD-CB
	DD13•CB8_abs400	DD13•CB8_ex420em600	DD13•CB7_abs400	DD13•CB7_abs430	DD13•CB7_ex420em600	Sample
	0.18958	3053.33	0.377	0.323	30365.5	CBD
	0.18958	2923.33	0.378	0.322	30217.5	CBD
	0.18458	2902.33	0.377	0.321	29702.5	CBD
	0.18958	3186.33	0.374	0.32	29418.5	CBD
	0.19458	3203.33	0.371	0.324	29610.5	CBD
	0.19558	3155.33	0.377	0.325	30677.5	CBD
	0.19658	3230.33	0.371	0.318	30311.5	CBD
	0.19058	3201.33	0.372	0.322	29835.5	CBD
	0.18858	2502.33	0.243	0.206	23735.5	Δ8-THC
	0.18658	2522.33	0.242	0.204	24260.5	Δ8-THC
	0.18558	2443.33	0.244	0.206	24516.5	Δ8-THC
	0.19058	2376.33	0.241	0.203	25013.5	Δ8-THC
	0.19758	2584.33	0.243	0.204	24497.5	Δ8-THC
	0.18958	2511.33	0.244	0.207	25096.5	Δ8-THC
	0.20358	2554.33	0.246	0.207	25220.5	Δ8-THC
	0.19258	2456.33	0.243	0.205	24763.5	Δ8-THC
	0.17158	4208.33	0.239	0.202	28416.5	Δ9-THC
	0.17458	4482.33	0.239	0.203	29047.5	Δ9-THC
	0.16958	4238.33	0.237	0.201	28823.5	Δ9-THC
	0.17058	4379.33	0.238	0.201	28891.5	Δ9-THC
	0.17758	4315.33	0.237	0.2	29141.5	Δ9-THC
	0.16958	4334.33	0.235	0.198	27384.5	Δ9-THC
	0.17958	4821.33	0.236	0.198	28503.5	Δ9-THC
	0.18058	4756.33	0.236	0.2	27144.5	Δ9-THC

## Sheet: S20_Cannabinoids_DD
	FigS20_Cannabinoids_DD
	DD4_abs480	DD4_ex480em570	DD4_ex480em600	DD8_abs440	DD8_ex380em570	DD13_abs400	DD13_abs430	DD13_ex420em600	Sample
	0.2255	1922.5	1053.25	0.067	163.25	0.11725	0.1265	302.25	CBD
	0.222	1888.5	1046.25	0.0665	147.25	0.12025	0.1295	387.25	CBD
	0.2155	1859.5	1064.25	0.067	166.25	0.11825	0.1275	369.25	CBD
	0.225	1875.5	1033.25	0.0675	161.25	0.12075	0.13	395.25	CBD
	0.219	1821.5	1003.25	0.068	167.25	0.12125	0.1305	362.25	CBD
	0.2245	1824.5	959.25	0.068	167.25	0.12175	0.13	337.25	CBD
	0.219	1852.5	1004.25	0.0685	155.25	0.12225	0.1315	386.25	CBD
	0.2205	1759.5	1030.25	0.067	152.25	0.11925	0.1285	344.25	CBD
	0.228	1800.5	958.25	0.0645	125.25	0.15475	0.156	354.25	∆8-THC
	0.2275	1798.5	1006.25	0.065	158.25	0.15475	0.155	351.25	∆8-THC
	0.226	1805.5	1006.25	0.064	151.25	0.15075	0.158	330.25	∆8-THC
	0.224	1793.5	965.25	0.0655	139.25	0.15175	0.1575	352.25	∆8-THC
	0.2265	1859.5	1025.25	0.064	152.25	0.15375	0.1585	327.25	∆8-THC
	0.2265	1819.5	1010.25	0.0645	128.25	0.15275	0.161	338.25	∆8-THC
	0.229	1842.5	958.25	0.066	149.25	0.15675	0.159	323.25	∆8-THC
	0.232	1792.5	1057.25	0.064	158.25	0.15625	0.161	342.25	∆8-THC
	0.232	1812.5	1021.25	0.0685	152.25	0.16675	0.163	364.25	∆9-THC
	0.233	1813.5	1005.25	0.0685	154.25	0.16675	0.165	331.25	∆9-THC
	0.233	1796.5	974.25	0.07	141.25	0.16775	0.164	360.25	∆9-THC
	0.224	1815.5	968.25	0.0685	156.25	0.16675	0.165	362.25	∆9-THC
	0.232	1765.5	969.25	0.068	140.25	0.16875	0.164	321.25	∆9-THC
	0.23	1880.5	967.25	0.07	139.25	0.16725	0.1645	328.25	∆9-THC
	0.232	1705.5	971.25	0.069	151.25	0.16675	0.164	336.25	∆9-THC
	0.234	1688.5	965.25	0.0685	130.25	0.16375	0.161	331.25	∆9-THC

## Sheet: S21_BenzoOpiates_DD-CB
	FigS21_BenzoOpiates_DD-CB
	DD13•CB7_ex420em600	DD13•CB8_ex420em600	DD13•CB7_abs400	DD13•CB7_abs430	DD13•CB8_abs400	DD8•CB8_abs440	DD8•CB8_ex380em570
	27059	1204	0.226	0.19	0.172	0.112	151	Etizolam
	26896	1188	0.227	0.191	0.171	0.108	168	Etizolam
	27725	1148	0.225	0.19	0.171	0.109	140	Etizolam
	27808	1228	0.23	0.189	0.172	0.104	150	Etizolam
	26963	1166	0.228	0.194	0.17	0.109	167	Etizolam
	26824	1224	0.229	0.192	0.171	0.122	172	Etizolam
	27764	1192	0.233	0.193	0.173	0.111	150	Etizolam
	26751	1251	0.229	0.193	0.175	0.123	173	Etizolam
	21667	877	0.209	0.179	0.157	0.12	179	Lorazepam
	23139	893	0.211	0.18	0.157	0.127	169	Lorazepam
	23306	871	0.208	0.178	0.156	0.126	187	Lorazepam
	22886	893	0.21	0.18	0.158	0.126	170	Lorazepam
	22997	912	0.21	0.18	0.156	0.124	174	Lorazepam
	23245	897	0.212	0.182	0.161	0.134	177	Lorazepam
	23624	909	0.211	0.18	0.163	0.12	183	Lorazepam
	23676	901	0.21	0.179	0.157	0.132	186	Lorazepam
	27684	1180	0.225	0.19	0.183	0.115	121	Diazepam
	26498	1124	0.224	0.188	0.172	0.105	128	Diazepam
	27146	1264	0.222	0.187	0.174	0.106	127	Diazepam
	26310	1204	0.222	0.187	0.173	0.11	125	Diazepam
	25779	1152	0.223	0.193	0.181	0.114	138	Diazepam
	26023	1251	0.229	0.188	0.179	0.108	126	Diazepam
	27782	1279	0.224	0.188	0.182	0.105	128	Diazepam
	26882	1235	0.225	0.19	0.18	0.11	145	Diazepam
	54756	3413	0.186	0.181	0.136	0.113	2196	Morphine
	52833	3216	0.186	0.181	0.135	0.113	2324	Morphine
	52822	3252	0.185	0.181	0.136	0.114	2224	Morphine
	55806	3351	0.191	0.186	0.136	0.112	2166	Morphine
	52854	3307	0.187	0.182	0.138	0.121	2111	Morphine
	55287	3219	0.19	0.185	0.137	0.12	2424	Morphine
	57250	3499	0.19	0.186	0.144	0.116	2293	Morphine
	56746	3526	0.192	0.188	0.141	0.115	2275	Morphine
	26903	3281	0.196	0.171	0.16	0.114	346	Heroin
	26607	3288	0.197	0.172	0.161	0.115	355	Heroin
	27504	3456	0.202	0.176	0.159	0.113	361	Heroin
	28896	3356	0.204	0.178	0.158	0.113	340	Heroin
	29450	3442	0.207	0.18	0.158	0.119	355	Heroin
	24914	3380	0.195	0.17	0.158	0.118	342	Heroin
	27787	3278	0.204	0.178	0.158	0.123	366	Heroin
	27267	3491	0.202	0.177	0.158	0.124	352	Heroin

## Sheet: S22_AnesAmphetAdult_DD-CB
	FigS22_AnesAmphetAdult_DD-CB
	DD13•CB7_abs400	DD13•CB8_abs400	DD4•CB8_abs480	DD4•CB8_ex480em570	DD4•CB8_ex480em600
	0.142	0.178	0.15075	16366.2	5629.33	Vitamin C
	0.14	0.176	0.15075	16288.2	5634.33	Vitamin C
	0.14	0.176	0.15075	16098.2	5583.33	Vitamin C
	0.14	0.175	0.15075	15768.2	5317.33	Vitamin C
	0.141	0.175	0.15075	16112.2	5499.33	Vitamin C
	0.14	0.176	0.15075	16109.2	5360.33	Vitamin C
	0.139	0.179	0.15075	16122.2	5673.33	Vitamin C
	0.14	0.181	0.15375	15688.2	5635.33	Vitamin C
	0.142	0.181	0.15375	16991.2	5902.33	Caffeine
	0.144	0.178	0.15275	16131.2	5580.33	Caffeine
	0.145	0.177	0.15475	16337.2	5595.33	Caffeine
	0.145	0.177	0.15375	16875.2	5778.33	Caffeine
	0.144	0.177	0.15275	17073.2	5921.33	Caffeine
	0.143	0.176	0.15375	16711.2	5777.33	Caffeine
	0.144	0.177	0.15375	16732.2	5563.33	Caffeine
	0.144	0.175	0.15575	17370.2	5991.33	Caffeine
	0.111	0.147	0.15775	3900.17	1393.33	Lidocaine
	0.115	0.147	0.15875	3842.17	1383.33	Lidocaine
	0.118	0.148	0.15975	4028.17	1391.33	Lidocaine
	0.115	0.149	0.16175	3963.17	1374.33	Lidocaine
	0.116	0.15	0.15975	4037.17	1340.33	Lidocaine
	0.118	0.152	0.16075	3900.17	1330.33	Lidocaine
	0.118	0.15	0.16075	3839.17	1375.33	Lidocaine
	0.118	0.15	0.16175	3878.17	1414.33	Lidocaine
	0.105	0.147	0.13975	12306.2	4449.33	Procaine
	0.103	0.146	0.13875	11995.2	4351.33	Procaine
	0.102	0.146	0.13775	12092.2	4422.33	Procaine
	0.107	0.149	0.13875	11885.2	4339.33	Procaine
	0.106	0.145	0.13975	12616.2	4462.33	Procaine
	0.108	0.148	0.13875	12137.2	4561.33	Procaine
	0.107	0.149	0.14175	13078.2	4672.33	Procaine
	0.107	0.148	0.14175	13011.2	4629.33	Procaine
	0.148	0.167	0.24875	6019.17	1704.33	Cocaine
	0.149	0.17	0.24975	6201.17	1852.33	Cocaine
	0.151	0.171	0.24775	6932.17	1823.33	Cocaine
	0.149	0.174	0.25875	6453.17	1826.33	Cocaine
	0.149	0.174	0.25875	7394.17	1795.33	Cocaine
	0.148	0.175	0.26075	7454.17	1764.33	Cocaine
	0.147	0.177	0.25875	7327.17	1791.33	Cocaine
	0.154	0.18	0.26175	5526.17	1727.33	Cocaine
	0.147	0.159	0.22875	12005.2	2114.33	MDMA
	0.148	0.163	0.22275	12402.2	2140.33	MDMA
	0.157	0.167	0.22775	12067.2	2071.33	MDMA
	0.155	0.168	0.22575	12674.2	2176.33	MDMA
	0.156	0.167	0.22175	12013.2	2095.33	MDMA
	0.155	0.166	0.21575	12551.2	2104.33	MDMA
	0.159	0.166	0.21675	12679.2	2080.33	MDMA
	0.155	0.163	0.21675	12346.2	2026.33	MDMA
	0.141	0.153	0.19475	3085.17	479.333	Levamisole
	0.147	0.156	0.19775	3186.17	538.333	Levamisole
	0.151	0.158	0.20175	3393.17	516.333	Levamisole
	0.152	0.156	0.20175	3323.17	503.333	Levamisole
	0.149	0.158	0.19875	3374.17	568.333	Levamisole
	0.144	0.163	0.20075	3326.17	490.333	Levamisole
	0.143	0.166	0.19975	3207.17	543.333	Levamisole
	0.153	0.155	0.19975	3141.17	491.333	Levamisole
	0.167	0.215	0.23075	21749.2	3459.33	Phenacetin
	0.165	0.213	0.23175	21817.2	3511.33	Phenacetin
	0.169	0.214	0.22875	21458.2	3486.33	Phenacetin
	0.168	0.216	0.23075	21971.2	3441.33	Phenacetin
	0.165	0.213	0.22575	21233.2	3412.33	Phenacetin
	0.166	0.215	0.22775	21713.2	3338.33	Phenacetin
	0.166	0.214	0.22675	22027.2	3485.33	Phenacetin
	0.165	0.218	0.23075	21212.2	3384.33	Phenacetin

## Sheet: S23_AllDrugsAdult_DD-CB
	FigS23_AllDrugsAdult_DD-CB
	DD13•CB8_abs400	DD13•CB8_ex420em600	DD4•CB8_abs520	DD4•CB8_ex480em600	DD8•CB8_ex380em570	DD13•CB7_abs400
	0.18958	3053.33	0.20525	3682.33	42.9167	0.377	CBD
	0.18958	2923.33	0.19825	3567.33	48.9167	0.378	CBD
	0.18458	2902.33	0.20325	3611.33	35.9167	0.377	CBD
	0.18958	3186.33	0.20525	3424.33	53.9167	0.374	CBD
	0.19458	3203.33	0.20125	3452.33	60.9167	0.371	CBD
	0.19558	3155.33	0.20725	3538.33	47.9167	0.377	CBD
	0.19658	3230.33	0.20825	3482.33	56.9167	0.371	CBD
	0.19058	3201.33	0.20425	3369.33	55.9167	0.372	CBD
	0.18858	2502.33	0.19825	3433.33	49.9167	0.243	Δ8-THC
	0.18658	2522.33	0.20025	3399.33	51.9167	0.242	Δ8-THC
	0.18558	2443.33	0.19525	3403.33	54.9167	0.244	Δ8-THC
	0.19058	2376.33	0.19425	3435.33	46.9167	0.241	Δ8-THC
	0.19758	2584.33	0.19725	3389.33	51.9167	0.243	Δ8-THC
	0.18958	2511.33	0.19525	3487.33	47.9167	0.244	Δ8-THC
	0.20358	2554.33	0.19625	3500.33	52.9167	0.246	Δ8-THC
	0.19258	2456.33	0.19625	3540.33	46.9167	0.243	Δ8-THC
	0.17158	4208.33	0.20625	3481.33	60.9167	0.239	Δ9-THC
	0.17458	4482.33	0.20725	3439.33	39.9167	0.239	Δ9-THC
	0.16958	4238.33	0.20725	3504.33	49.9167	0.237	Δ9-THC
	0.17058	4379.33	0.20925	3399.33	56.9167	0.238	Δ9-THC
	0.17758	4315.33	0.21125	3428.33	60.9167	0.237	Δ9-THC
	0.16958	4334.33	0.20525	3295.33	52.9167	0.235	Δ9-THC
	0.17958	4821.33	0.21025	3267.33	58.9167	0.236	Δ9-THC
	0.18058	4756.33	0.21025	3251.33	45.9167	0.236	Δ9-THC
	0.178	1082.33	0.14425	5629.33	138.5	0.142	Vitamin C
	0.176	1116.33	0.14425	5634.33	142.5	0.14	Vitamin C
	0.176	1042.33	0.14425	5583.33	156.5	0.14	Vitamin C
	0.175	1016.33	0.14425	5317.33	133.5	0.14	Vitamin C
	0.175	1055.33	0.14425	5499.33	146.5	0.141	Vitamin C
	0.176	1034.33	0.14425	5360.33	155.5	0.14	Vitamin C
	0.179	1110.33	0.14425	5673.33	129.5	0.139	Vitamin C
	0.181	1045.33	0.14525	5635.33	141.5	0.14	Vitamin C
	0.181	1095.33	0.14425	5902.33	135.5	0.142	Caffeine
	0.178	1052.33	0.14325	5580.33	135.5	0.144	Caffeine
	0.177	1095.33	0.14525	5595.33	131.5	0.145	Caffeine
	0.177	1088.33	0.14525	5778.33	135.5	0.145	Caffeine
	0.177	1094.33	0.14325	5921.33	134.5	0.144	Caffeine
	0.176	1107.33	0.14425	5777.33	149.5	0.143	Caffeine
	0.177	1062.33	0.14525	5563.33	137.5	0.144	Caffeine
	0.175	1078.33	0.14625	5991.33	134.5	0.144	Caffeine
	0.147	952.333	0.10025	1393.33	469.5	0.111	Lidocaine
	0.147	1007.33	0.10025	1383.33	502.5	0.115	Lidocaine
	0.148	993.333	0.10125	1391.33	477.5	0.118	Lidocaine
	0.149	950.333	0.10225	1374.33	468.5	0.115	Lidocaine
	0.15	1013.33	0.10125	1340.33	467.5	0.116	Lidocaine
	0.152	1007.33	0.10125	1330.33	489.5	0.118	Lidocaine
	0.15	971.333	0.10125	1375.33	483.5	0.118	Lidocaine
	0.15	1019.33	0.10225	1414.33	499.5	0.118	Lidocaine
	0.147	31768.3	0.13225	4449.33	36389.5	0.105	Procaine
	0.146	30277.3	0.13225	4351.33	35754.5	0.103	Procaine
	0.146	30154.3	0.13125	4422.33	36563.5	0.102	Procaine
	0.149	32210.3	0.13125	4339.33	36051.5	0.107	Procaine
	0.145	30495.3	0.13225	4462.33	35002.5	0.106	Procaine
	0.148	32022.3	0.13225	4561.33	36043.5	0.108	Procaine
	0.149	32834.3	0.13425	4672.33	36706.5	0.107	Procaine
	0.148	32490.3	0.13325	4629.33	36396.5	0.107	Procaine
	0.167	19202.3	0.22125	1704.33	5001.5	0.148	Cocaine
	0.17	19258.3	0.22125	1852.33	4955.5	0.149	Cocaine
	0.171	19599.3	0.21925	1823.33	4858.5	0.151	Cocaine
	0.174	20400.3	0.22925	1826.33	4559.5	0.149	Cocaine
	0.174	20441.3	0.22825	1795.33	4575.5	0.149	Cocaine
	0.175	20493.3	0.23025	1764.33	4794.5	0.148	Cocaine
	0.177	20795.3	0.22825	1791.33	4765.5	0.147	Cocaine
	0.18	21270.3	0.23125	1727.33	4625.5	0.154	Cocaine
	0.159	23130.3	0.19325	2114.33	2680.5	0.147	MDMA
	0.163	23941.3	0.19025	2140.33	2587.5	0.148	MDMA
	0.167	25639.3	0.19325	2071.33	2790.5	0.157	MDMA
	0.168	25559.3	0.19325	2176.33	2824.5	0.155	MDMA
	0.167	24831.3	0.18925	2095.33	2775.5	0.156	MDMA
	0.166	25295.3	0.18725	2104.33	2899.5	0.155	MDMA
	0.166	24728.3	0.18725	2080.33	2878.5	0.159	MDMA
	0.163	25116.3	0.18625	2026.33	2666.5	0.155	MDMA
	0.153	9262.33	0.15425	479.333	163.5	0.141	Levamisole
	0.156	9391.33	0.15725	538.333	168.5	0.147	Levamisole
	0.158	9658.33	0.16125	516.333	155.5	0.151	Levamisole
	0.156	9358.33	0.16225	503.333	161.5	0.152	Levamisole
	0.158	9440.33	0.16225	568.333	158.5	0.149	Levamisole
	0.163	9911.33	0.16225	490.333	153.5	0.144	Levamisole
	0.166	10114.3	0.16225	543.333	166.5	0.143	Levamisole
	0.155	9803.33	0.16325	491.333	166.5	0.153	Levamisole
	0.148	1083.5	0.1525	5625.5	138	0.17	Etizolam
	0.142	1089.5	0.1505	5903.5	117	0.176	Etizolam
	0.146	1097.5	0.1525	5947.5	139	0.173	Etizolam
	0.144	1125.5	0.1535	5856.5	115	0.169	Etizolam
	0.145	1049.5	0.1515	5912.5	161	0.173	Etizolam
	0.144	1137.5	0.1505	5671.5	138	0.176	Etizolam
	0.147	1112.5	0.1495	5737.5	137	0.176	Etizolam
	0.144	1124.5	0.1555	5685.5	151	0.176	Etizolam
	0.127	834.5	0.1455	5224.5	141	0.145	Lorazepam
	0.13	827.5	0.1465	5317.5	155	0.146	Lorazepam
	0.131	873.5	0.1485	5252.5	130	0.148	Lorazepam
	0.133	885.5	0.1505	5550.5	157	0.152	Lorazepam
	0.13	876.5	0.1495	5618.5	133	0.144	Lorazepam
	0.131	867.5	0.1515	5390.5	141	0.145	Lorazepam
	0.132	824.5	0.1475	5396.5	131	0.15	Lorazepam
	0.132	877.5	0.1505	5645.5	149	0.15	Lorazepam
	0.139	1052.5	0.1535	6112.5	93	0.169	Diazepam
	0.138	1115.5	0.1535	6027.5	105	0.169	Diazepam
	0.138	1093.5	0.1545	5978.5	90	0.172	Diazepam
	0.138	1114.5	0.1535	6147.5	95	0.173	Diazepam
	0.137	1059.5	0.1535	6001.5	116	0.17	Diazepam
	0.138	1097.5	0.1545	6219.5	114	0.171	Diazepam
	0.139	1082.5	0.1535	6017.5	113	0.173	Diazepam
	0.139	1079.5	0.1525	6076.5	113	0.177	Diazepam
	0.102	3249.5	0.1065	1498.5	2275	0.137	Morphine
	0.1	3091.5	0.1085	1509.5	2291	0.136	Morphine
	0.1	3062.5	0.1105	1617.5	2261	0.139	Morphine
	0.1	3004.5	0.1105	1562.5	2254	0.137	Morphine
	0.101	3150.5	0.1095	1571.5	2342	0.138	Morphine
	0.1	3017.5	0.1085	1484.5	2233	0.139	Morphine
	0.101	3036.5	0.1105	1582.5	2331	0.14	Morphine
	0.104	3231.5	0.1085	1502.5	2222	0.139	Morphine
	0.118	3035.5	0.1325	4388.5	738	0.145	Heroin
	0.12	3227.5	0.1325	4387.5	748	0.15	Heroin
	0.119	3043.5	0.1345	4593.5	729	0.15	Heroin
	0.121	3234.5	0.1315	4474.5	727	0.149	Heroin
	0.12	3312.5	0.1335	4367.5	751	0.149	Heroin
	0.121	3250.5	0.1335	4368.5	763	0.142	Heroin
	0.121	3224.5	0.1305	4515.5	735	0.144	Heroin
	0.121	3163.5	0.1335	4519.5	759	0.147	Heroin

## Sheet: S27_StreetSamplesA-I_DD-CB
	FigS27_StreetSamplesA-I_DD-CB
	DD4•CB8_ex480em570	DD8•CB8_ex380em570	DD4•CB8_ex480em580	DD13•CB8_abs430	DD13•CB8_ex420em600	DD13•CB7_abs400	DD13•CB7_ex420em600
	11923.2	168.75	10483.2	0.09629	2401.25	0.11392	13402.2	Blank
	11710.2	164.75	10062.2	0.09729	2406.25	0.11192	13556.2	Blank
	11792.2	180.75	10292.2	0.09696	2346.25	0.11292	13289.2	Blank
	11422.2	166.75	9798.25	0.09696	2384.25	0.11425	13267.2	Blank
	11410.2	155.75	9947.25	0.09729	2345.25	0.11492	13508.2	Blank
	11820.2	170.75	10322.2	0.09796	2346.25	0.11492	13414.2	Blank
	11480.2	169.75	10029.2	0.09829	2400.25	0.11392	13118.2	Blank
	11543.2	154.75	9886.25	0.09629	2438.25	0.11392	12947.2	Blank
	6790.25	6701.75	5624.25	0.08729	6752.25	0.09192	33322.2	A
	7058.25	6725.75	6042.25	0.08829	6898.25	0.09292	34128.2	A
	6963.25	6834.75	6055.25	0.08729	6803.25	0.09192	34069.2	A
	7285.25	6986.75	6069.25	0.08829	6836.25	0.09292	34824.2	A
	7106.25	6906.75	6129.25	0.08829	6870.25	0.09358	34211.2	A
	7140.25	6816.75	5957.25	0.08729	6829.25	0.09325	33087.2	A
	7163.25	6878.75	6034.25	0.09129	7118.25	0.09392	35360.2	A
	7170.25	7080.75	6083.25	0.08629	6843.25	0.09292	35659.2	A
	5295.25	551.75	4639.25	0.10329	1370.25	0.07492	2335.25	E
	5298.25	563.75	4567.25	0.10129	1307.25	0.07592	2343.25	E
	5370.25	565.75	4769.25	0.10229	1317.25	0.07692	2284.25	E
	5259.25	585.75	4595.25	0.10129	1397.25	0.07692	2252.25	E
	5447.25	586.75	4727.25	0.10129	1355.25	0.07792	2217.25	E
	5153.25	541.75	4562.25	0.10296	1372.25	0.07792	2363.25	E
	5612.25	603.75	5026.25	0.10362	1489.25	0.07892	2395.25	E
	5297.25	543.75	4662.25	0.10562	1391.25	0.07892	2407.25	E
	7136.25	764.75	6401.25	0.10696	1370.25	0.08258	4963.25	F
	7217.25	712.75	6271.25	0.10729	1321.25	0.08192	4874.25	F
	7162.25	782.75	6294.25	0.10829	1393.25	0.08392	4810.25	F
	7136.25	717.75	6216.25	0.10929	1437.25	0.08125	4820.25	F
	7155.25	746.75	6395.25	0.10762	1469.25	0.08392	4838.25	F
	6879.25	772.75	5938.25	0.10629	1319.25	0.08092	4843.25	F
	7185.25	758.75	6190.25	0.11129	1478.25	0.08058	4891.25	F
	7000.25	722.75	6170.25	0.10796	1406.25	0.08092	4712.25	F
	11391.2	131.75	9971.25	0.09129	1954.25	0.11025	12898.2	B
	11096.2	168.75	9536.25	0.08996	1904.25	0.11458	12695.2	B
	10956.2	154.75	9428.25	0.08962	1931.25	0.11192	12643.2	B
	11281.2	152.75	9704.25	0.09029	1980.25	0.11192	12469.2	B
	11191.2	142.75	9721.25	0.09029	1855.25	0.11158	12449.2	B
	10902.2	153.75	9563.25	0.09029	1906.25	0.11192	12133.2	B
	10449.2	136.75	9178.25	0.09396	1943.25	0.11192	12258.2	B
	10422.2	153.75	9041.25	0.09329	1978.25	0.11192	12852.2	B
	6368.25	6877.75	5412.25	0.08929	11326.2	0.08192	3845.25	C
	6395.25	6947.75	5540.25	0.08729	10685.2	0.08092	3872.25	C
	6430.25	6905.75	5480.25	0.08796	11405.2	0.07992	3606.25	C
	6366.25	7087.75	5507.25	0.08929	10990.2	0.08092	3912.25	C
	6428.25	6926.75	5549.25	0.08896	11165.2	0.08092	3715.25	C
	6618.25	7065.75	5668.25	0.08796	10838.2	0.07892	3716.25	C
	6686.25	7286.75	5745.25	0.08662	10635.2	0.08192	3914.25	C
	6684.25	7368.75	5777.25	0.08329	10270.2	0.08092	4025.25	C
	6914.25	1776.75	5957.25	0.09729	9944.25	0.08092	2090.25	D
	6836.25	1790.75	5831.25	0.09629	10081.2	0.08092	2077.25	D
	7012.25	1762.75	5956.25	0.09462	9950.25	0.07992	2035.25	D
	6711.25	1771.75	5815.25	0.09662	9635.25	0.07992	2038.25	D
	7013.25	1734.75	6042.25	0.09629	9899.25	0.07925	1963.25	D
	6859.25	1747.75	5799.25	0.09729	9867.25	0.08258	2009.25	D
	6990.25	1729.75	6038.25	0.09762	9927.25	0.08192	2070.25	D
	6673.25	1792.75	5745.25	0.09262	9336.25	0.08092	2030.25	D
	3646.25	612.75	3134.25	0.08629	1088.25	0.06992	425.25	G
	3541.25	613.75	3044.25	0.08696	1152.25	0.07092	396.25	G
	3498.25	659.75	3003.25	0.08329	1097.25	0.07025	470.25	G
	3477.25	594.75	3083.25	0.08529	1080.25	0.07125	458.25	G
	3511.25	641.75	3155.25	0.08529	1177.25	0.06992	403.25	G
	3690.25	607.75	3148.25	0.08629	1160.25	0.06892	400.25	G
	3615.25	611.75	3181.25	0.09029	1073.25	0.06825	430.25	G
	3541.25	594.75	3170.25	0.08929	1073.25	0.06792	407.25	G
	4168.25	671.75	3723.25	0.09129	1027.25	0.07192	409.25	H
	4292.25	650.75	3776.25	0.09196	1055.25	0.07058	387.25	H
	4105.25	656.75	3691.25	0.09129	1093.25	0.07192	403.25	H
	4385.25	660.75	3843.25	0.09196	1084.25	0.07292	415.25	H
	4498.25	649.75	3879.25	0.09496	1148.25	0.07192	420.25	H
	4230.25	732.75	3563.25	0.09329	1058.25	0.07258	415.25	H
	4605.25	714.75	3906.25	0.09696	1117.25	0.07392	424.25	H
	4158.25	700.75	3734.25	0.09429	1109.25	0.07092	393.25	H
	4583.25	756.75	4026.25	0.09129	1352.25	0.07225	533.25	I
	4516.25	727.75	3862.25	0.09429	1399.25	0.07258	460.25	I
	4475.25	721.75	3823.25	0.09329	1295.25	0.07258	531.25	I
	4627.25	702.75	4093.25	0.09229	1391.25	0.07192	458.25	I
	4606.25	749.75	3985.25	0.09029	1244.25	0.07292	460.25	I
	4647.25	703.75	3995.25	0.08729	1420.25	0.07292	513.25	I
	4663.25	748.75	4080.25	0.09262	1312.25	0.07092	473.25	I
	4480.25	691.75	3898.25	0.09129	1260.25	0.07092	454.25	I

## Sheet: S28_StreetSamplesA-I_DD
	FigS28_StreetSamplesA-I_DD
	DD4_ex480em570	DD4_ex480em580	DD8_ex380em570	DD13_abs400	DD13_abs430	DD13_ex420em600
	2115.38	1832	230.625	0.09913	0.1115	489.625	Blank
	2134.38	1839	210.625	0.09813	0.1105	477.625	Blank
	2175.38	1858	246.625	0.09713	0.1105	488.625	Blank
	2038.38	1744	216.625	0.09813	0.1105	462.625	Blank
	2068.38	1803	263.625	0.09879	0.11117	472.625	Blank
	2148.38	1936	244.625	0.09713	0.1105	478.625	Blank
	2133.38	1804	215.625	0.09913	0.1115	492.625	Blank
	2081.38	1805	218.625	0.09813	0.1105	492.625	Blank
	4104.38	3408	3079.62	0.07213	0.0905	2235.62	A
	4092.38	3480	3009.62	0.07213	0.0895	2110.62	A
	4146.38	3537	3019.62	0.07113	0.0895	2077.62	A
	4053.38	3479	3019.62	0.07113	0.0895	2020.62	A
	3964.38	3333	2853.62	0.07213	0.0905	2043.62	A
	3974.38	3457	2861.62	0.07113	0.0895	2038.62	A
	4027.38	3367	2953.62	0.07213	0.0905	2066.62	A
	3907.38	3438	3076.62	0.07113	0.0895	1998.62	A
	2000.38	1713	241.625	0.08713	0.0985	447.625	E
	1969.38	1628	240.625	0.08513	0.0965	418.625	E
	1951.38	1693	239.625	0.08413	0.0955	420.625	E
	1850.38	1515	203.625	0.08513	0.0965	442.625	E
	1968.38	1683	213.625	0.08713	0.0985	449.625	E
	2003.38	1704	207.625	0.08613	0.0975	423.625	E
	1920.38	1688	230.625	0.08613	0.0975	448.625	E
	1959.38	1663	225.625	0.08413	0.0955	447.625	E
	2005.38	1745	250.625	0.09113	0.1035	454.625	F
	2020.38	1701	229.625	0.08913	0.1015	474.625	F
	1903.38	1676	235.625	0.08713	0.0995	474.625	F
	1962.38	1660	249.625	0.09113	0.1035	445.625	F
	1952.38	1684	259.625	0.08913	0.1015	425.625	F
	1899.38	1656	227.625	0.09013	0.1025	446.625	F
	1939.38	1665	227.625	0.09179	0.10417	444.625	F
	1942.38	1654	224.625	0.08913	0.1015	450.625	F
	2021.38	1739	201.625	0.09613	0.1095	461.625	B
	2053.38	1799	221.625	0.09513	0.1075	443.625	B
	1966.38	1719	214.625	0.09413	0.1065	446.625	B
	2014.38	1734	229.625	0.09413	0.1075	467.625	B
	1985.38	1789	191.625	0.09613	0.1085	453.625	B
	1956.38	1727	196.625	0.09413	0.1075	443.625	B
	1966.38	1653	204.625	0.09513	0.1075	437.625	B
	2030.38	1762	214.625	0.09313	0.1055	430.625	B
	3621.38	3156	1535.62	0.08113	0.0975	942.625	C
	3584.38	3209	1553.62	0.08213	0.0985	847.625	C
	3618.38	3301	1444.62	0.08313	0.0995	936.625	C
	3577.38	3193	1569.62	0.08313	0.1005	915.625	C
	3376.38	2995	1542.62	0.08146	0.09783	841.625	C
	3475.38	3017	1556.62	0.08213	0.0985	951.625	C
	3542.38	3124	1439.62	0.08313	0.0995	942.625	C
	3422.38	3074	1560.62	0.08213	0.0985	930.625	C
	3014.38	2647	1204.62	0.08313	0.0985	506.625	D
	2991.38	2613	1105.62	0.08113	0.0965	506.625	D
	2895.38	2537	1138.62	0.08113	0.0965	547.625	D
	2952.38	2543	1065.62	0.08379	0.09817	510.625	D
	2901.38	2582	1236.62	0.08313	0.0975	517.625	D
	2974.38	2650	1237.62	0.08413	0.0985	518.625	D
	2966.38	2642	1140.62	0.08213	0.0975	528.625	D
	2743.38	2481	1150.62	0.08013	0.0945	534.625	D
	1925.38	1656	224.625	0.08713	0.0995	429.625	G
	1940.38	1665	253.625	0.08613	0.0985	417.625	G
	1980.38	1743	251.625	0.08913	0.1015	399.625	G
	1943.38	1649	247.625	0.08646	0.09883	442.625	G
	1839.38	1663	260.625	0.08913	0.1015	463.625	G
	1929.38	1711	243.625	0.08846	0.09983	411.625	G
	1933.38	1607	260.625	0.08713	0.0985	419.625	G
	1850.38	1650	246.625	0.08913	0.1015	409.625	G
	1952.38	1741	233.625	0.09013	0.1025	478.625	H
	2000.38	1684	228.625	0.09079	0.10317	429.625	H
	1986.38	1681	224.625	0.09013	0.1025	397.625	H
	1973.38	1781	235.625	0.08813	0.1005	463.625	H
	1974.38	1722	226.625	0.08813	0.1005	425.625	H
	1936.38	1631	228.625	0.09113	0.1035	442.625	H
	2094.38	1799	264.625	0.09013	0.1025	483.625	H
	2059.38	1788	262.625	0.09013	0.1025	472.625	H
	2019.38	1684	235.625	0.08879	0.10117	450.625	I
	1934.38	1704	217.625	0.08913	0.1005	425.625	I
	2012.38	1697	256.625	0.08913	0.1005	383.625	I
	1969.38	1671	239.625	0.08779	0.10017	449.625	I
	1945.38	1576	251.625	0.08813	0.1005	409.625	I
	1937.38	1665	251.625	0.08713	0.0995	411.625	I
	2052.38	1732	260.625	0.08613	0.0985	455.625	I
	2015.38	1724	255.625	0.08846	0.10083	401.625	I
